# Supplementary material for: Hemocompatible glutaminase freel-asparaginase from marine Bacillus tequilensis PV9W with anticancer potential modulating p53 expression
Source: Royal Society of Chemistry journal article supplement (doi:10.1039/c6ra00727a), 2016-01-01
Supplement: c6ra00727a1.pdf [file c6ra00727a1.pdf]

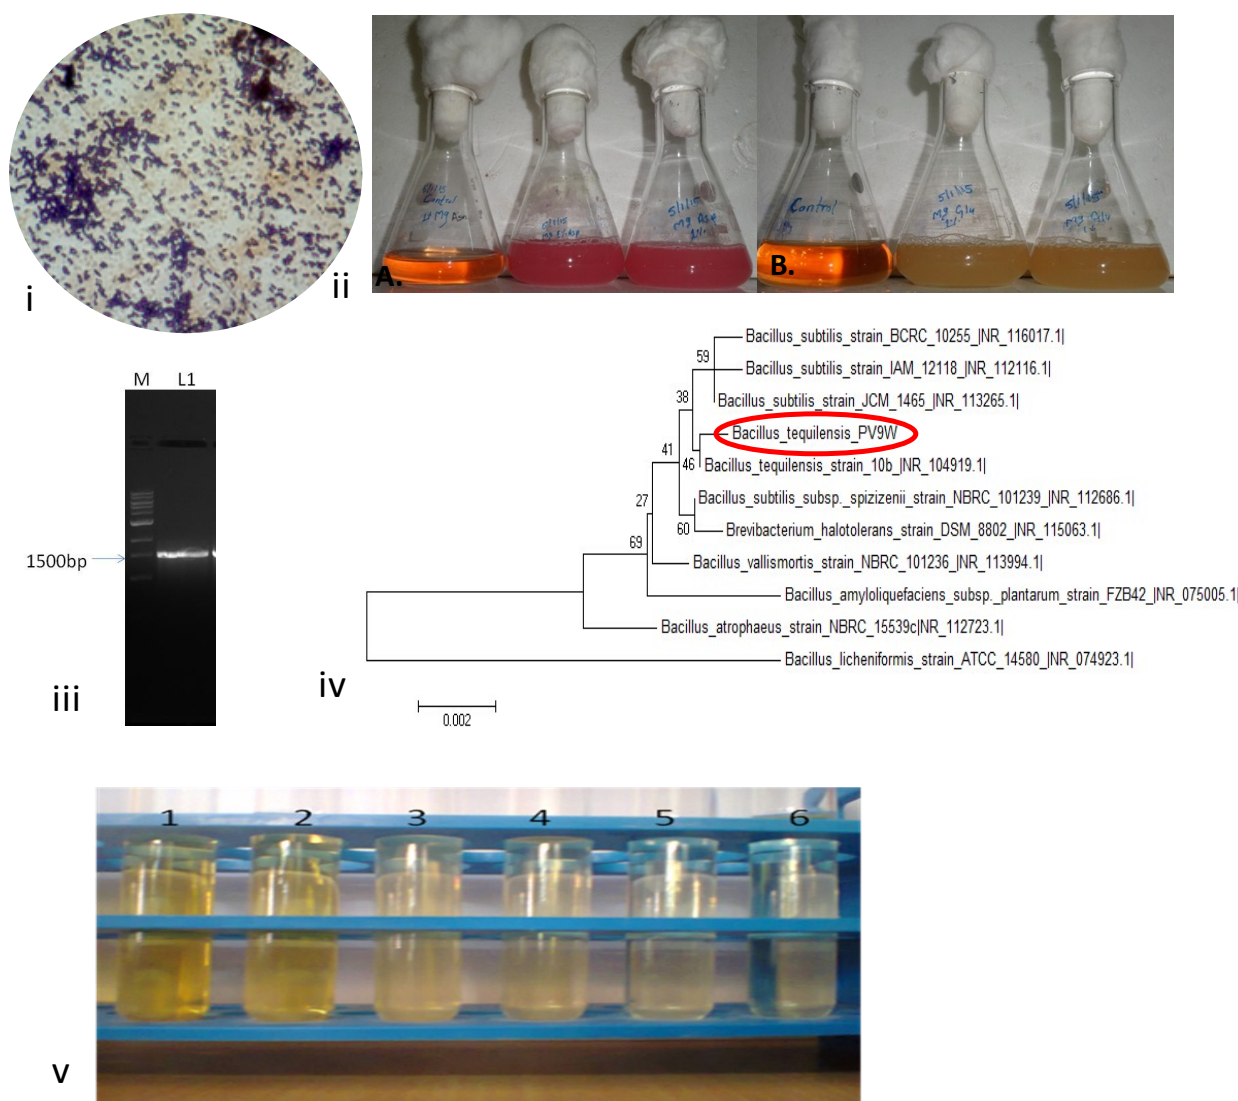

Supplementary Fig. 1 (i) Gram staining of isolate PV9W (gram +ve rods), (ii) Screening of PV9W for the production of L-asparaginase and L-glutaminase using M-9 medium with (A) L-asparagine as substrate (B) L-glutamine as substrate (Flask to the left in each image indicates uninoculated sterile broth.). Pink colour developed indicates positive reaction for the presence of the enzyme. (iii) 16s amplified region of PV9W. BLAST analysis of the sequence of amplified region showed 99% with *Bacillus tequilensis* (iv) Phylogenetic analysis of *Bacillus tequilensis* PV9W using MEGA 6 software. Bootstrap analysis with 1000 replications showed its relation closer to *Bacillus tequilensis* strain 10b. (v) Enzyme assay of crude enzyme (culture supernatant of *Bacillus tequilensis* PV9W grown in M-9 +1% L-asparagine) by direct nesslerization method. Tube 1, 2- Test with enzyme +substrate, Tube 3, 4- Substrate blank- (Enzyme without substrate), Tube 5, 6- Enzyme blank (Substrate without enzyme)
